# Supplementary material for: Fenestrated Physician-Modified Endografts for Preservation of Main and Accessory Renal Arteries in Juxtarenal Aortic Aneurysms
Source: MDPI journal article supplement (doi:10.3390/jcm12144708), 2023-07-15
Supplement: s1 [file s1]

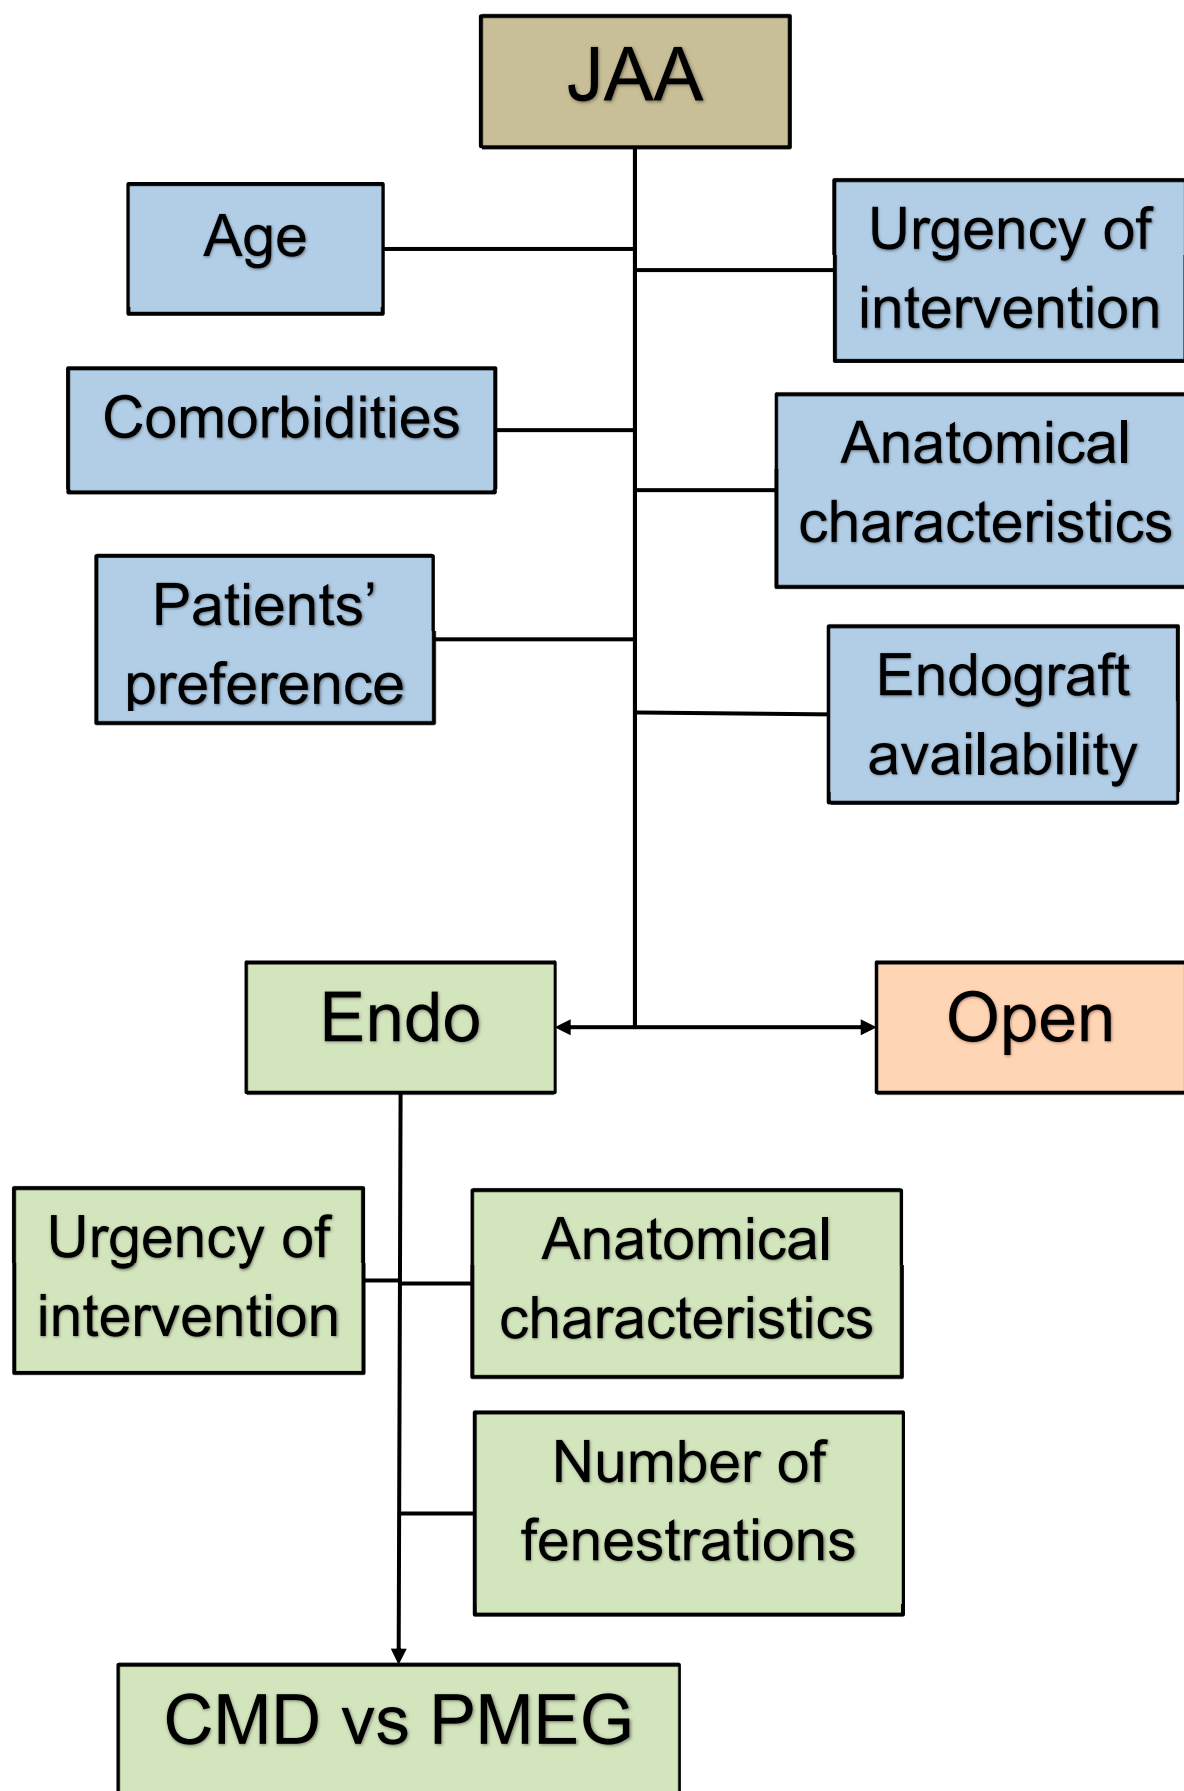

Figure S1. Flowchart of factors influencing treatment decision for patients with juxtarenal aortic aneurysms in our institution. Open repair with suprarenal clamping was offered to all patients fit for open surgery

(functional capacity  $\geq 4$  METs). Custom-made fenestrated devices were preferred in patients less fit for open repair and where the procedure was planned 3-4 months in advance, with difficult target vessel anatomy and/or  $> 2$  target vessels. Physician-modified devices were considered in all patients with ruptured or symptomatic juxtarenal AAA as well as in elective cases with 1-2 target vessels". Custom-made devices (CMD) and physician-modified endograft (PMEG)

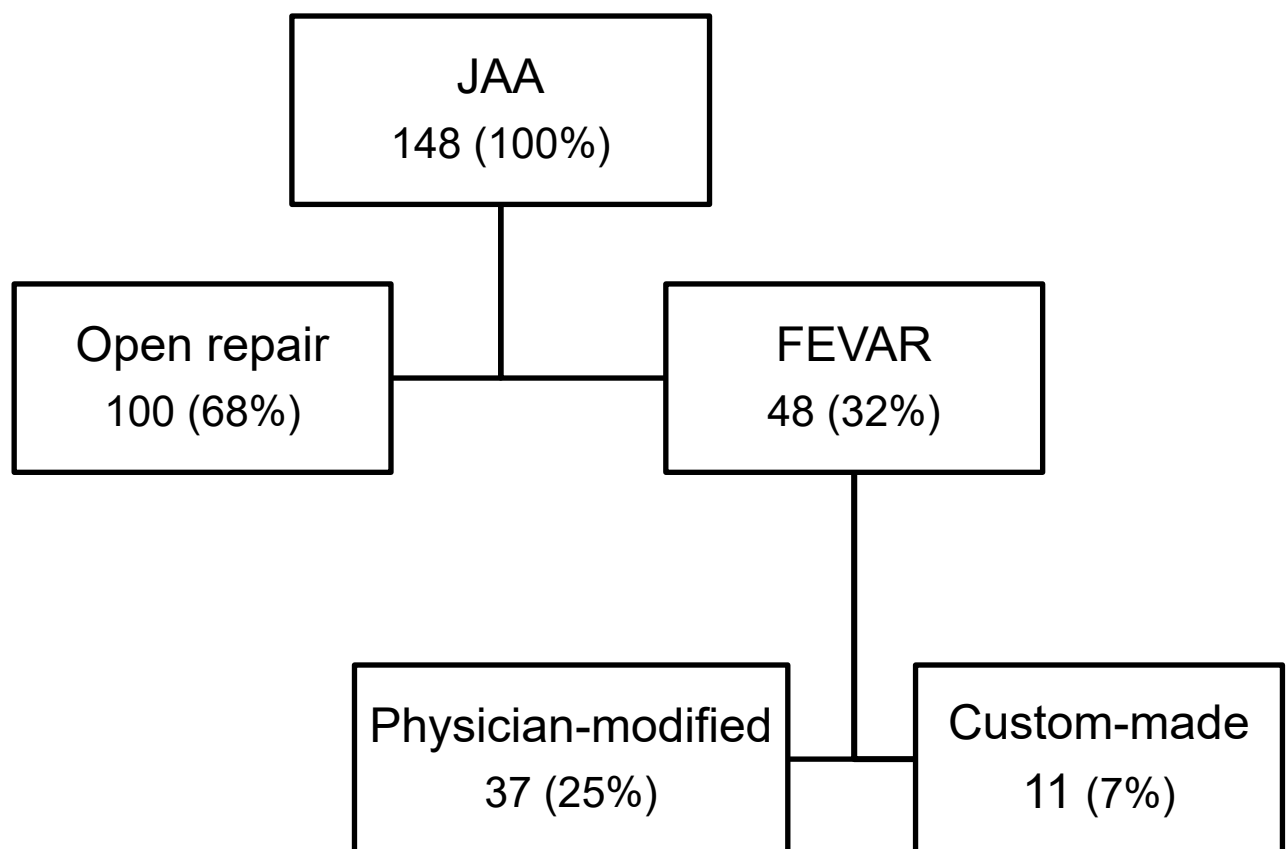

Figure S2. Flowchart of all patients with juxtarenal aortic aneurysms (JAA) treated between March 2019 and January 2023 in our department. Fenestrated endovascular aortic repair (FEVAR)

Figure S3. Failed catheterization of an accessory renal artery (ARA), which remained patent without bridging stent during follow-up. A: intraoperative angiogram prior deployment of physician-modified stent-graft with 1x fenestration for the ARA; B: final angiogram intraoperatively with patent ARA; C: one-year postoperative CT-angiography with patent ARA and no endoleak

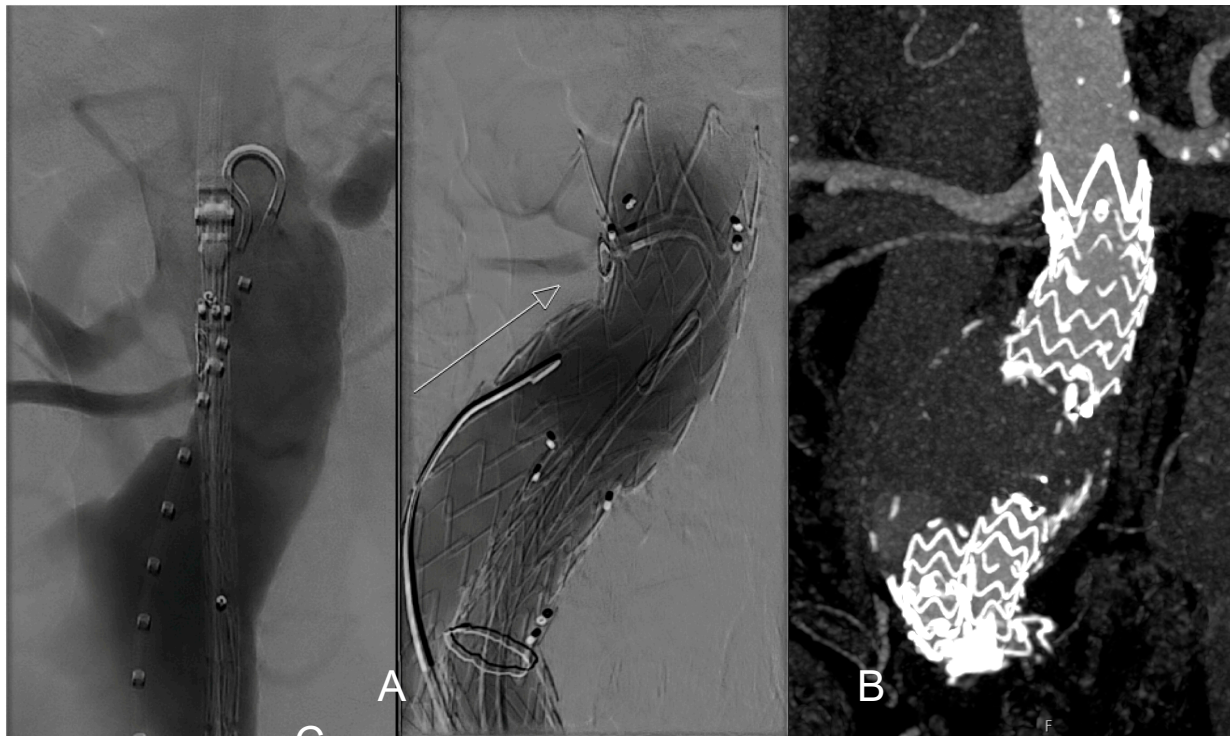

|                                       |
|---------------------------------------|
| Patient number                        |
| Gender                                |
| Type of graft                         |
| Date of Admission                     |
| Date of Surgery                       |
| Date of discharge                     |
| Date of Death                         |
| Cause of Death                        |
| Life Status on Study Closing Date     |
| <b><u>Patient characteristics</u></b> |
| Height [m]                            |
| Weight [kg]                           |
| BMI [kg/m <sup>2</sup> ]              |
| Coronary artery disease               |
| Atrial Fibrillation                   |
| Myocardial Infarction                 |
| Arrhythmia                            |
| Unstable Angina                       |
| Heart insufficiency                   |
| CABG                                  |
| PTCA/Stent                            |
| Hypertension                          |
| Hypercholesterolemia                  |
| Smoker                                |
| Active Smoking                        |
| COPD                                  |
| Steroids/Home O <sub>2</sub>          |
| Diabetes Mellitus                     |
| Renal Impairment                      |
| Baseline Creatinine [ul/L]            |
| Baseline GFR [ml/min]                 |
| Stroke                                |
| TIA                                   |
| Connective Tissue Disorder            |
| Cancer                                |
| Peripheral Arterial Disease           |
| SVS Cardiac Score                     |
| SVS Respiratory Score                 |
| SVS Renal Score                       |
| SVS Hypertension Score                |
| SVS Age Score                         |
| SVS Total Score                       |
| ASA Clinical Score                    |

|                                        |
|----------------------------------------|
| <b><u>Preoperative Medication</u></b>  |
| Aspirin                                |
| Plavix                                 |
| NOAK/OAK                               |
| Anticholesterol Medication             |
| Nitrates                               |
| Ca Channel Blockers                    |
| ACE Inhibitors / AT Receptor Inhibitor |
| B-Blockers                             |
| <b><u>Aneurysm characteristics</u></b> |
| Previous aortic operation              |
| Kind of previous operation             |
| Previous abdominal surgery             |
| CTA Preoperative                       |
| CTA Date                               |
| Type of Aortic Pathology               |
| Largest Diameter of Aneurysm [mm]      |
| Status of Aneurysm                     |
| Organ Complication                     |
| Type of Aneurysm                       |
| Proximal Endograft Size                |
| Proximal Aortic Diameter               |
| Proximal Oversize                      |
| Alpha Angle                            |
| Beta Angle                             |
| Calcification in Proximal Landing Zone |
| Thrombus in Proximal Landing Zone      |
| Target vessels                         |
| Diameter of Target Vessel              |
| Technical Success                      |
| Access Vessel                          |
| Steerable Sheath                       |
| Total Operation Time [min]             |
| Type of Contrast                       |
| Volume of Contrast [ml]                |
| Dosis Area Product (DAP) [mGy/cm2]     |
| Fluoroscopy Time [min]                 |
| Endoleak at Final Angiography          |
| Type of Endoleak                       |
| Immediate Intervention                 |
| Blood Loss [ml]                        |
| EK [units]                             |
| FFP [units]                            |

|                                |
|--------------------------------|
| TC [units]                     |
| Cellsaver [ml]                 |
| Hospital Death                 |
| <b><u>Complications</u></b>    |
| SIRS/Sepsis                    |
| Myocardial Infarction          |
| Respiratory Failure            |
| Stroke/TIA                     |
| Paraplegia                     |
| Renal failure                  |
| Arrhythmia                     |
| Pancreatitis                   |
| Mesenteric ischemia            |
| Ischemic colitis               |
| Other GI Complications         |
| Bleeding                       |
| Early Re-Intervention          |
| Access Complication            |
| Creatinine at Discharge [ul/L] |
| GFR at Discharge [ml/min]      |
| ICU Length of Stay             |
| IMC Length of Stay             |
| CTA Before Discharge           |
| Date of CTA at Discharge       |
| Endoleak                       |
| Type of Endoleak               |
| Intervention                   |
| <b><u>Follow-up</u></b>        |
| Date of Follow Up 1            |
| Date of CTA                    |
| Any Complication               |
| Any Secondary Intervention     |
| Date of Secondary Intervention |
| Kind of Secondary Intervention |
| Any Branch Stenosis/Occlusion  |
| Any Aneurysm Rupture           |
| Sac Change                     |
| Final Sac diameter             |
| Any Late Endoleak              |
| Type of Endoleak               |

Table S1. Collected study parameters
